# Supplementary figures and images for: Orthoflavivirus Lammi in Russia: Possible Transovarial Transmission and Trans-Stadial Survival in Aedes cinereus (Diptera, Culicidae)
Source: MDPI journal article supplement (doi:10.3390/v16040527), 2024-03-28

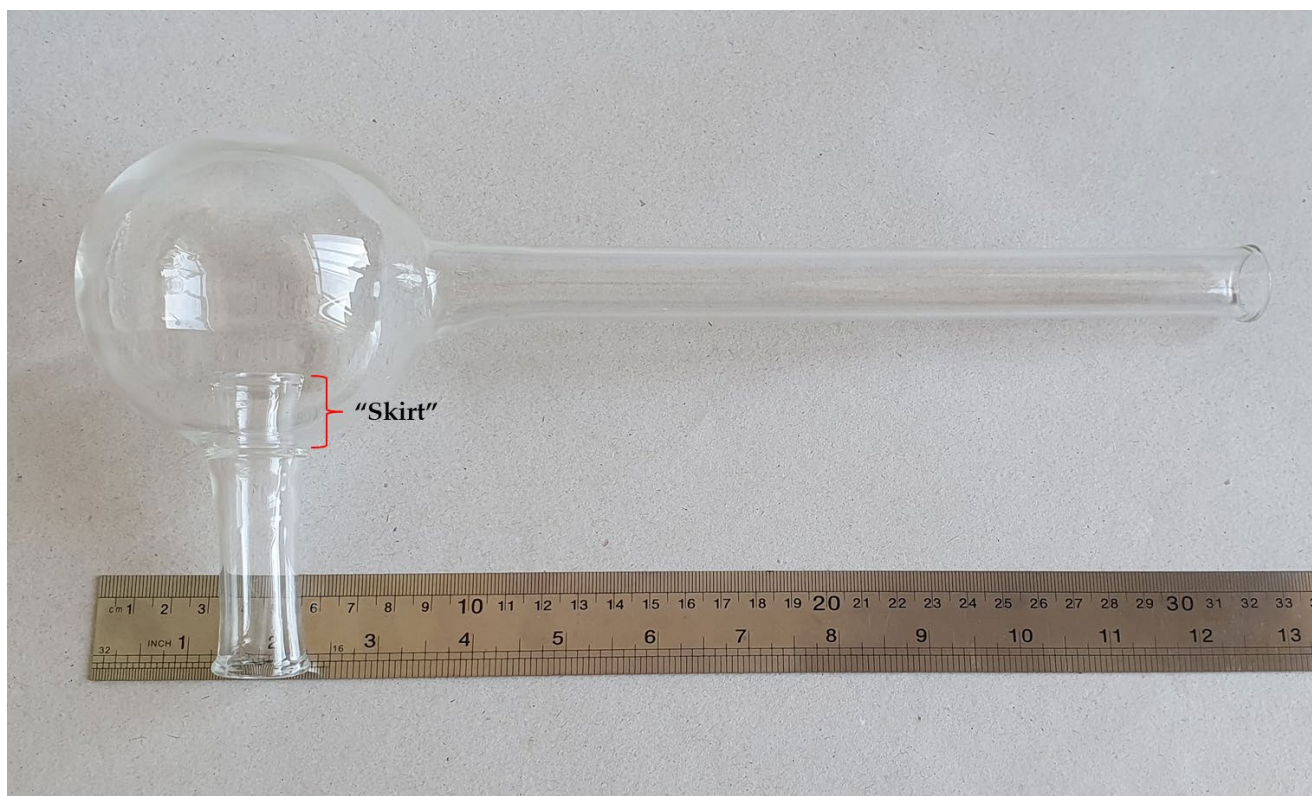

**Figure S1.** Krishtal trap.

Supplement: s1 [file s1]
